# Supplementary material for: Revised Morning Loops of the Arabidopsis Circadian Clock Based on Analyses of Direct Regulatory Interactions
Source: PLoS One. 2015 Dec 1;10(12):e0143943. doi: 10.1371/journal.pone.0143943 (PMC4666590; doi:10.1371/journal.pone.0143943)
Supplement: S1 File — (XLSX) [file pone.0143943.s003.xlsx]

## Sheet: Figure 1
Fig 1. Binding of LHY and CCA1 to the promoters of clock-associated genes.
A: In vivo binding of LHY to the promoters of clock-associated genes was tested by ChIP-qPCR analyses of wild-type samples using a polyclonal antibody to the LHY protein.
		WT (Ler)					lhy-21
		Precipitated DNA ( % of input)	SEM				Precipitated DNA ( % of input)	SEM
	ACTIN	0.00145072	4.91666e-05			ACTIN	0.00110098	0.000349997
	PRR7	0.0608898	0.00416984			PRR7	0.0129431	0.00338306
	PRR9	0.0840003	0.0102953			PRR9	0.0129133	0.00133232
	GI	0.0444211	0.000532235			GI	0.00961676	0.0020179
	ELF4	0.0901834	0.00076802			ELF4	0.0153604	0.00556267
	TOC1	0.145001	0.0375877			LUX	0.012487	0.00454713
	LUX	0.0451826	0.0138603			TOC1	0.0224733	0.00308618
	LHY	0.0156958	0.000555132			LHY	0.00534125	0.00157677
	CCA1	0.00937629	0.00937629			CCA1	0.0067885	0.00255324
	PRR5	0.0417619	0.0183308			PRR5	0.00819886	0.00383575
	PRR3	0.0248794	0.0106872			PRR3	0.00222264	0.000541873
B: In vivo binding of CCA1 was tested by performing ChIP-qPCR analyses on cca1-1 CCA1pro::CCA1-HA-YFP or wild-type plants using an antibody to the YFP tag.
		CCA1::YFP			WT(Col)
	Detector	Precipitated DNA ( % of input)	SEM		Precipitated DNA ( % of input)	SEM
	ACTIN	0.00115483	0.000293193		0.000933371	0.00148515
	CCA1	0.00567302	0.000716845		0.00101199	0.00113775
	ELF4	0.040563	0.00973415		0.00150232	0.00190017
	GI	0.0211791	0.00243094		0.000208366	0.000242859
	LHY	0.0044256	0.00110727		0	0
	LUX	0.0178015	0.000861117		0.000718897	0.00080768
	PRR3	0.00433207	0.00285686		0.000472108	0.000723271
	PRR5	0.00953662	0.00236143		0	0
	PRR7	0.0236324	0.004		0.000299478	0.000350995
	PRR9	0.0116223	0.00586583		0.000374713	0.000556972
	TOC1	0.0313657	0.00333787		0.00209293	0.00233573
C: In vitro binding of LHY to purified genomic DNA. Bacterially expressed, His-tagged LHY protein was used to pull down sheared, purified genomic DNA. The resulting enrichment for different target promoter sequences was quantified by real time PCR using the same primers as used for ChIP analyses, and expressed as a percentage of input material.
	Precipitated DNA ( % of input)													StDEV
		ACTIN	PRR7	PRR9	GI	ELF4	TOC1	LHY	CCA1			ACTIN	PRR7	PRR9	GI	ELF4	TOC1	LHY	CCA1
	no protein	0.00254508	0.0160116	0	0	1.01063	0	N/A	N/A		no protein	0.000161944	0.00917806	0	0	0.0667272	0	N/A	N/A
	7nM LHY	0.00307953	0.138561	0.345142	0.89209	18.7471	29.5536	N/A	N/A		7nM LHY	0.00115668	0.0231056	0.0280119	0.136236	0.637172	7.11795	N/A	N/A
	10nM LHY	0.00719858	2.23756	4.30276	9.7716	29.7592	50.4551	N/A	N/A		10nM LHY	0.000860821	0.0981118	0.403094	2.34754	0.533264	12.6169	N/A	N/A
	15nM LHY	0.0124469	11.8372	10.0463	15.5114	39.0864	123.234	N/A	N/A		15nM LHY	0.00452789	2.90332	0.532535	1.63653	0.743609	25.8895	N/A	N/A
	23nM LHY	1.85137	26.087	23.6745	32.7918	61.9026	136.895	0.00751295	0.0835391		23nM LHY	0.189301	5.78091	1.51816	3.62118	2.63908	28.7002	0.00162263	0.011802
	34nM LHY	2.97989	41.6986	32.9436	46.8051	66.6529	328.996	N/A	N/A		34nM LHY	1.01716	3.5675	3.68016	8.15256	1.77335	68.4635	N/A	N/A

## Sheet: Figure 2
Fig 2. LHY represses expression of other clock components.
B- Expression of clock-associated transcripts was quantified uisng Nanostring technology 2 h after induction of the ALCpro::LHY transgene. Transcript levels were normalised to the constitutive transcript UBC12 and data were averaged from two repeat experiments.
ZT values indicate the time at which the tissue was harvested.
		Means													Standard errors
		ALCpro::LHY	ALCpro::LHY	ALCpro::LHY	ALCpro::LHY	ALCpro::LHY	ALCpro::LHY	Control	Control	Control	Control	Control	Control		ALCpro::LHY	ALCpro::LHY	ALCpro::LHY	ALCpro::LHY	ALCpro::LHY	ALCpro::LHY	Control	Control	Control	Control	Control	Control
ATG number	Gene name	ZT2	ZT6	ZT10	ZT14	ZT18	ZT22	ZT2	ZT6	ZT10	ZT14	ZT18	ZT22		ZT2	ZT6	ZT10	ZT14	ZT18	ZT22	ZT2	ZT6	ZT10	ZT14	ZT18	ZT22
AT1G01060	LHY	10.8055	3.82741	3.47372	3.92366	4.84402	7.90758	7.83969	0.261142	0.0169051	0.0100443	0.586616	3.85827		0.896575	0.303257	0.799642	0.182819	0.0912005	0.0840088	0.700504	0.0319917	0.00251242	0.0029521	0.267999	0.000925881
AT1G22770	GI	0.499708	0.626367	1.20986	0.242247	0.0720885	0.0612347	0.694473	1.43654	2.0588	0.374865	0.0838062	0.0630995		0.0196847	0.0117006	0.0531031	0.0696283	0.00888312	0.0144934	0.0240552	0.122436	0.203141	0.0699004	0.00289594	0.0120938
AT2G25930	ELF3	0.268497	0.398558	0.930252	1.03278	0.931048	0.697203	0.272583	0.823094	1.40194	1.78309	1.52887	1.01462		0.00468995	0.0498916	0.117896	0.0116155	0.157346	0.0296582	0.0425297	0.0888776	0.16052	0.229902	0.137378	0.0371059
AT2G40080	ELF4	0.0523489	0.141664	1.43101	1.09966	0.679336	0.428314	0.0599972	0.290577	3.85139	3.44124	1.90394	0.564715		0.0100457	0.00900312	0.0634384	0.207876	0.11186	0.101783	0.00591919	0.0414573	0.0455618	0.215078	0.46458	0.118475
AT2G46790	PRR9	0.717766	0.565629	0.405552	0.1249	0.0703464	0.185176	1.0664	1.07966	0.305284	0.0888246	0.0737116	0.245472		0.0708796	0.0262958	0.0148184	0.0071753	0.00657666	0.0238856	0.0646279	0.127206	0.0211412	0.0194787	0.00607567	0.0644371
AT2G46830	CCA1	3.31086	0.488168	0.0362768	0.00841914	0.0833512	0.865996	4.05177	0.877451	0.0349598	0.0142134	0.159409	1.5378		0.582897	0.0915008	0.00693312	0.00378951	0.0421548	0.0543459	0.329256	0.180647	0.0090531	0.00239308	0.0700473	0.0679674
AT3G46640	LUX	0.104544	0.165755	0.788498	0.437469	0.332568	0.226321	0.0987634	0.363567	1.904	1.07942	0.638013	0.301192		0.0140621	0.0224213	0.00162543	0.118025	0.0235265	0.0597636	0.0023004	0.0440034	0.13054	0.243326	0.188582	0.0691521
AT5G02810	PRR7	0.86394	2.2557	2.00308	0.235045	0.0856451	0.103868	1.06857	3.52755	2.03938	0.239394	0.0620905	0.0849862		0.0860318	0.382367	0.212349	0.0657324	0.019618	0.0288184	0.205542	0.436358	0.0872758	0.0486927	0.00014357	0.0246414
AT5G24470	PRR5	0.0197998	0.386276	0.479456	0.0647003	0.0621205	0.0479606	0.0202996	1.43341	1.72537	0.256134	0.288347	0.10108		0.000998396	0.196276	0.130421	0.00143726	0.00738013	0.00187762	0.00301233	0.642295	0.326408	0.0536128	0.0277087	0.0174542
AT5G60100	PRR3	0.01842	0.0444244	0.543924	0.43701	0.169793	0.0653287	0.0175837	0.119467	0.744263	0.553834	0.211699	0.0753043		0.00155655	0.0110911	0.0937306	0.0163751	0.0051506	0.00642903	0.00251277	0.0407448	0.0277579	0.0786568	0.00637962	0.000591675
AT5G61380	TOC1	0.149279	0.264529	1.2368	0.865156	0.59248	0.352868	0.143179	0.591552	2.41627	2.05308	1.38981	0.495601		0.0176689	0.0238628	0.245296	0.0926689	0.103202	0.00723713	0.0248277	0.0677793	0.0167351	0.294214	0.06215	0.0360084
C : levels of PRR7 and PRR9 mRNA expression 26 h after induction of the Alcpro::LHY transgene at ZT17
Transcript levels from Quantitative RT-PCR analyses were normalized relative to ACTIN and to wild-type mRNA levels at the time of ethanol addition.
		LHY cDNA	5UTR	PRR7	PRR9
alc::LHY	mean	21.3609	0.95809	50.0119	49.938
	SEM	1.74592	0.123044	3.98529	6.74833
Col	mean	3.14215	1.29424	5.20392	5.06186
	SEM	0.270043	0.219459	0.518828	0.313501

## Sheet: Figure 3
Fig 3. Induction of the ALCpro::LHY transgene abrogates the peak of LHY and CCA1 expression at dawn.
C: Quantification of LHY protein levels following ALCpro::LHY induction
LHY protein (relative to WT at time 0)
Time after ethanol addition(h)	WT	ALCpro::LHY
0	1	0
2	4.21298	91.4868
4	47.3628	88.4068
6	72.7501	78.3621
8	81.4436	94.3936
10	86.4843	77.7569
12	62.8626	82.0653
D: Changes in endogenous LHY mRNA levels following ALCpro::LHY induction, as determined by quantitative RT-PCR.
Transcript levels were normalized to the ACTIN transcript and to levels in control plants at time zero.
	WT			ALCpro::LHY
Time after ethanol addition(h)	mean	SEM		mean	SEM
0	1	0.407642		0.933833	0.249023
2	5.99181	0.345304		7.41452	1.67796
4	35.2962	13.4202		27.7675	6.33964
6	79.597	12.3655		25.2041	5.63145
8	157.198	38.4993		84.9971	4.479
10	80.5554	5.947		78.4883	2.50066
12	18.9089	5.71171		27.789	2.162
E: Changes in endogenous CCA1 mRNA levels following ALCpro::LHY induction, as determined by quantitative RT-PCR.
Transcript levels were normalized to the ACTIN transcript and to levels in control plants at time zero.
	WT			ALCpro::LHY
Time after ethanol addition(h)	mean	SEM		mean	SEM
0	1	0.128021		2.39035	0.581871
2	2.62975	0.929768		2.72813	0.3677
4	13.9138	3.22173		7.92207	2.88046
6	28.1033	7.29019		9.74612	3.63265
8	54.8841	12.9744		36.69	7.74198
10	35.5225	2.04945		36.2487	6.25337
12	16.2234	4.4466		16.2164	0.978023

## Sheet: Figure S1
S1 Fig: Effects of ethanol on PRR7 and PRR9 expression in Alcpro:::LHY plants, Alcpro::GUS and wild-type plants.
Ethanol (6% v/v) was added to different groups of ALCPro::LHY plants 2, 6 or 10 hours after dawn, and changes in transcript levels were determined after 2 hours as described for Figure 2. Error bars indicate standard errors of the mean of technical triplicates.
plants	treatment	ZT	LHY/ACTIN	upper error bar	lower error bar	PRR7/ACTIN	upper error bar	lower error bar	PRR9/ACTIN	upper bar	lower bar	GUS/ACTIN	upper error bar	lower error bar
WT	mock	2	0.0134772	0.00547547	0.0038936	0.00759887	0.00212211	0.00165885	0.000557657	0.000209469	0.000152272
WT	mock	6	0.000377387	0.000117097	8.93678e-05	0.118531	0.0220972	0.018625	0.00071159	0.000127358	0.000108024
WT	EtOH	10	4.49911e-05	5.58751e-06	4.97024e-06	0.0459646	0.0457563	0.0229301	7.91671e-06	7.08036e-06	3.73761e-06
WT	EtOH	2	0.0102849	0.00539714	0.00353965	0.00916277	0.00639074	0.00376487	0.000356618	0.000209236	0.000131867
WT	EtOH	6	0.000493384	0.000242164	0.000162436	0.0908733	0.0412992	0.0283947	0.000871024	0.000376195	0.000262724
WT	mock	10	2.43903e-05	1.57698e-05	9.57742e-06	0.0241807	0.0140881	0.00890175	3.40637e-06	2.37403e-06	1.39901e-06
ALcpro::LHY	mock	2	0.00795825	0.0021111	0.0016685	0.00901577	0.00482312	0.00314217	0.000338552	0.000128115	9.29436e-05
ALcpro::LHY	mock	6	0.000767968	0.000194528	0.000155212	0.0591286	0.00426578	0.00397873	0.000418737	9.8554e-05	7.97775e-05
ALcpro::LHY	mock	10	0.000609536	8.57566e-05	7.51795e-05	0.0268302	0.00599045	0.00489707	1.18343e-05	1.51762e-06	1.34512e-06
ALcpro::LHY	EtOH	2	0.005846	0.0021993	0.00159809	0.00375579	0.00122964	0.000926355	0.000132965	3.82171e-05	2.9685e-05
ALcpro::LHY	EtOH	6	0.00692006	0.00149738	0.00123101	0.0246888	0.00347015	0.0030425	8.90515e-05	3.78468e-05	2.65592e-05
ALcpro::LHY	EtOH	10	0.011425	0.000461007	0.000443126	0.0665231	0.0272189	0.0193156	8.87595e-06	7.6362e-07	7.03128e-07
ALCpro:GUS	mock	2	0.0304658	0.01067	0.00790238	0.0220206	0.00570526	0.00453127	0.00106865	0.000329133	0.000251633	0.00320232	0.00126682	0.000907726
ALCpro:GUS	mock	6	0.000603232	7.66305e-05	6.79931e-05	0.0710511	0.0130098	0.0109963	0.000648772	0.000219978	0.000164277	0.00119951	0.000199161	0.000170802
ALCpro:GUS	mock	10	0.000107008	3.5385e-05	2.65917e-05	0.0627895	0.0141631	0.0115564	3.19609e-05	8.94383e-06	6.98826e-06	0.00435433	0.00106302	0.000854429
ALCpro:GUS	EtOH	2	0.0314674	0.00302812	0.0027623	0.024575	0.00529781	0.00435827	0.00142647	0.000556669	0.000400412	4.19887	0.849919	0.706843
ALCpro:GUS	EtOH	6	0.000550616	0.000103936	8.74323e-05	0.0938608	0.0107048	0.00960889	0.000375214	0.000202328	0.000131447	2.28153	0.406371	0.344934
ALCpro:GUS	EtOH	10	3.52179e-05	4.41673e-06	3.92454e-06	0.0534129	0.0138933	0.0110254	1.31007e-05	1.05412e-06	9.75623e-07	0.715323	0.0814738	0.073143

## Sheet: Figure S2
S2 Fig. LHY and CCA1 down-regulate their own and each other’s expression.
Expression of the Alcpro::LHY (A-C) or Alcpro::CCA1 transgenes (D-F) was induced by ethanol (1% v/v) at ZT 17 as described in Figure 2.
A: Quantification of LHY protein levels following ALCpro::LHY induction
LHY protein (relative to WT at time 0)
Time after ethanol addition(h)	WT	ALCpro::LHY
0	1	0.5
2	0.443543	23.858
4	2.57267	61.4725
6	9.53423	54.5808
7	21.1546	50.1861
9	19.6622	73.4293
11	11.9396	74.2692
B: Quantification of endogenous LHY mRNA levels following ALCpro::LHY induction
		WT			ALCpro::LHY
Time after ethanol addition(h)		mean	sem		mean	sem
0	c17	1	0.0691661		1.28358	0.275011
2	c19	2.95773	0.673307		2.80327	0.279651
4		14.1103	2.31723		14.9749	0.346248
6	c23	14.1103	1.25553		12.335	1.30981
7	c24	16.9384	2.89237		19.0654	2.7846
9	c2	35.6029	2.95217		17.1316	4.22979
11	c4	16.833	2.09673		11.6276	4.15005
C: Quantification of CCA1 mRNA levels following ALCpro::LHY induction
		WT			ALCpro::LHY
Time after ethanol addition(h)		mean	sem		mean	sem
0	c17	1	0.175331		2.2362	0.0839157
2	c19	4.08177	0.275808		2.21968	0.922065
4		17.2305	0.483411		7.78436	0.412867
6	c23	30.1876	4.67806		18.388	5.16978
7	c24	39.706	2.48142		22.6251	3.80368
9	c2	56.0778	1.39267		21.8395	9.827
11	c4	50.6878	3.36228		20.7728	3.7863
D: Quantification of total CCA1 mRNA levels following ALCpro::CCA1 induction
		WT			ALCpro::CCA1
Time after ethanol addition(h)		mean	sem		mean	sem
0	c17	1	1.94334		0.0704332	0.140225
2	c19	2.53713	66.9381		0.767765	14.3373
4		12.9688	44.0518		2.60808	4.08195
6	c23	25.63	76.5026		1.46481	38.6467
7	c24	33.0085	103.875		1.34571	15.4552
9	c2	32.5665	N/A		2.18391	#VALUE!
11	c4	14.9763	125.934		2.77255	14.5484
E: Quantification of endogenous CCA1 mRNA levels following ALCpro::CCA1 induction
		WT			ALCpro::CCA1
Time after ethanol addition(h)		mean	sem		mean	sem
0	c17	1	#REF!		1.37584	#REF!
2	c19	5.59073	#REF!		3.15868	#REF!
4		65.6363	#REF!		30.6093	#REF!
6	c23	102.498	#REF!		87.8484	#REF!
7	c24	211.358	#REF!		72.3865	#REF!
9	c2	112.106	#REF!		N/A	N/A
11	c4	23.6216	#REF!		23.6757	#REF!
F: Quantification of endogenous CCA1 mRNA levels following ALCpro::CCA1 induction
		WT			ALCpro::CCA1
Time after ethanol addition(h)		mean	sem		mean	sem
0	c17	1	0.123818		0.867516	0.113182
2	c19	3.14386	0.134396		2.46765	0.290375
4		17.4221	0.739637		8.9591	0.550086
6	c23	26.1315	4.8029		17.8621	2.91644
7	c24	63.6898	12.5538		30.3293	8.05591
9	c2	21.2068	1.79053		N/A	N/A
11	c4	4.45284	1.79159		6.13289	1.84387
